# Supplementary material for: Reaction dynamics inside superfluid helium nanodroplets: the formation of the Ne2molecule from Ne + Ne@(4He)N
Source: Royal Society of Chemistry journal article supplement (doi:10.1039/c6cp03942a), 2016-01-01
Supplement: c6cp03942a1.pdf [file c6cp03942a1.pdf]

## SUPPORTING INFORMATION

### Reaction Dynamics Inside Superfluid Helium Nanodroplets. The Formation of the Ne<sub>2</sub> Molecule From Ne + Ne@(4He)<sub>N</sub>

Arnau Vilà and Miguel González\*

Departament Química Física i IQTC, Universitat de Barcelona, c/ Martí i Franquès, 1,  
08028 Barcelona, Spain.

## CONTENTS

|                                                                                                                                                                                                                          |        |
|--------------------------------------------------------------------------------------------------------------------------------------------------------------------------------------------------------------------------|--------|
| <b>Table S1.</b> Parameters defining the helium and neon Cartesian grids for $N=500$                                                                                                                                     | page 3 |
| <b>Table S2.</b> Final propagation times for $N=500$                                                                                                                                                                     | page 4 |
| <b>Figure S1.</b> Maxwell velocity distribution of a Ne atom at $T = 300$ K                                                                                                                                              | page 4 |
| <b>Figure S2.</b> Trajectories of the mean values of the Ne atoms velocities and positions as a function of $\langle v_0 \rangle$ for the nanodroplet with $N=500$                                                       | page 5 |
| <b>Figure S3.</b> Snapshots showing the temporal evolution of the probability density of the relative coordinate wave packet in coordinate and momentum representations, for $\langle v_0 \rangle = 120$ m/s and $N=500$ | page 6 |

- Movie 1.** Time evolution of the relative coordinate wave packet and the effective potential. Time evolution of the helium density in the xz-plane.  $N=500$ ,  $\langle v_0 \rangle = 120$  m/s page 7
- Movie 2.** The same as Movie 1 but for  $N=500$ ,  $\langle v_0 \rangle = 500$  m/s page 7
- Movie 3.** The same as Movie 1 but for  $N=500$ ,  $\langle v_0 \rangle = 800$  m/s page 7
- Movie 4.** The same as Movie 1 but for  $N=200$ ,  $\langle v_0 \rangle = 120$  m/s page 7
- Movie 5.** The same as Movie 1 but for  $N=200$ ,  $\langle v_0 \rangle = 800$  m/s page 7
- Movie 6.** The same as Movie 1 but for  $N=1000$ ,  $\langle v_0 \rangle = 120$  m/s page 7
- Movie 7.** The same as Movie 1 but for  $N=1000$ ,  $\langle v_0 \rangle = 800$  m/s page 7

**Table S1.** Parameters defining the helium and neon Cartesian grids for the helium nanodroplet with  $N=500$ .<sup>a,b</sup>

| $\langle v_0 \rangle$ (m/s) | $hz_{\text{Ne}}$ (Å) | $hz$ (Å) | $hx=hy$ (Å) |
|-----------------------------|----------------------|----------|-------------|
| <b>120</b>                  | 0.114                | 0.3      | 0.4         |
| <b>210</b>                  | 0.114                | 0.3      | 0.4         |
| <b>300</b>                  | 0.114                | 0.3      | 0.4         |
| <b>500</b>                  | 0.114                | 0.3      | 0.4         |
| <b>800</b>                  | 0.089                | 0.2      | 0.4         |
| <b>1200</b>                 | 0.067                | 0.2      | 0.4         |

<sup>a</sup> The parameters  $h$  refer to the spatial separation of the grids.

<sup>b</sup> The limits of the helium grid for this nanodroplet (radius=20.0 Å) have been taken as  $x_{\text{min}}=y_{\text{min}}=-26.0$  Å and  $z_{\text{min}}=-30.0$  Å and  $x_{\text{max}}=y_{\text{max}}=25.6$  Å and  $z_{\text{max}}=29.7$  Å for  $\langle v_0 \rangle$  below 750 m/s; and  $x_{\text{min}}=y_{\text{min}}=-26.0$  Å and  $z_{\text{min}}=-28.6$  Å and  $x_{\text{max}}=y_{\text{max}}=25.6$  Å and  $z_{\text{max}}=28.4$  Å. The limits of the Ne atoms grid correspond to  $r_{\text{min}}=1.5$  Å and  $r_{\text{max}}=30.0$  Å (120 and 300 m/s) or 32.0 Å (above 300 m/s).

**Table S2.** Final propagation times for the helium nanodroplet with  $N=500$ .

| $\langle v_0 \rangle$ (m/s) | $t_{\text{final}}$ (ps) |
|-----------------------------|-------------------------|
| <b>120</b>                  | 188.2                   |
| <b>210</b>                  | 204.7                   |
| <b>300</b>                  | 195.5                   |
| <b>500</b>                  | 128.2                   |
| <b>800</b>                  | 177.1                   |
| <b>1200</b>                 | 105.5                   |

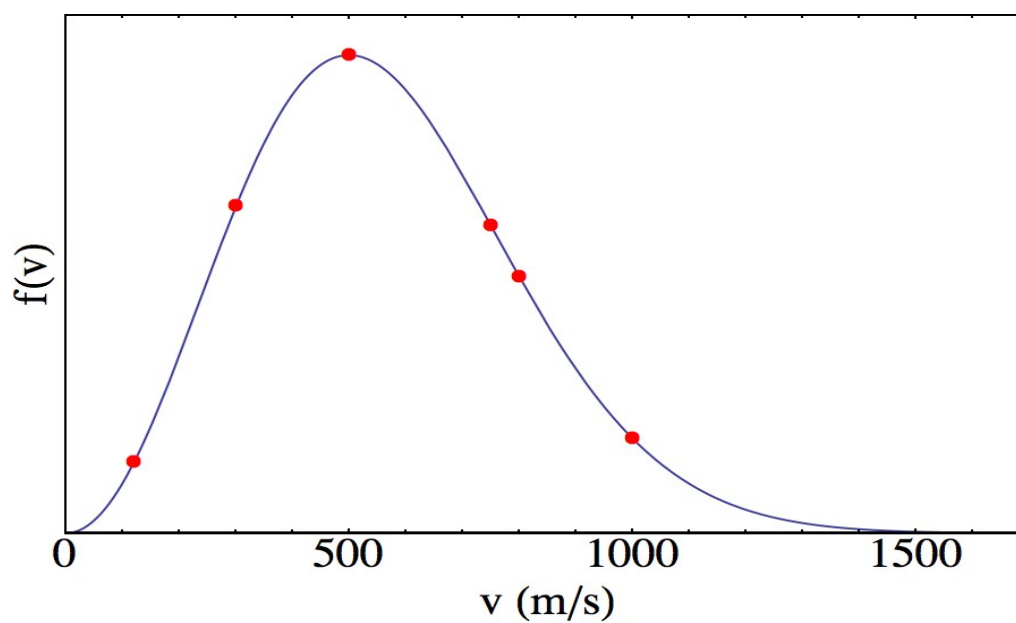

**Figure S1.** Maxwell velocity distribution of Ne in gas phase at a temperature of 300 K.

The red points indicate the main selected velocities considered in this work.

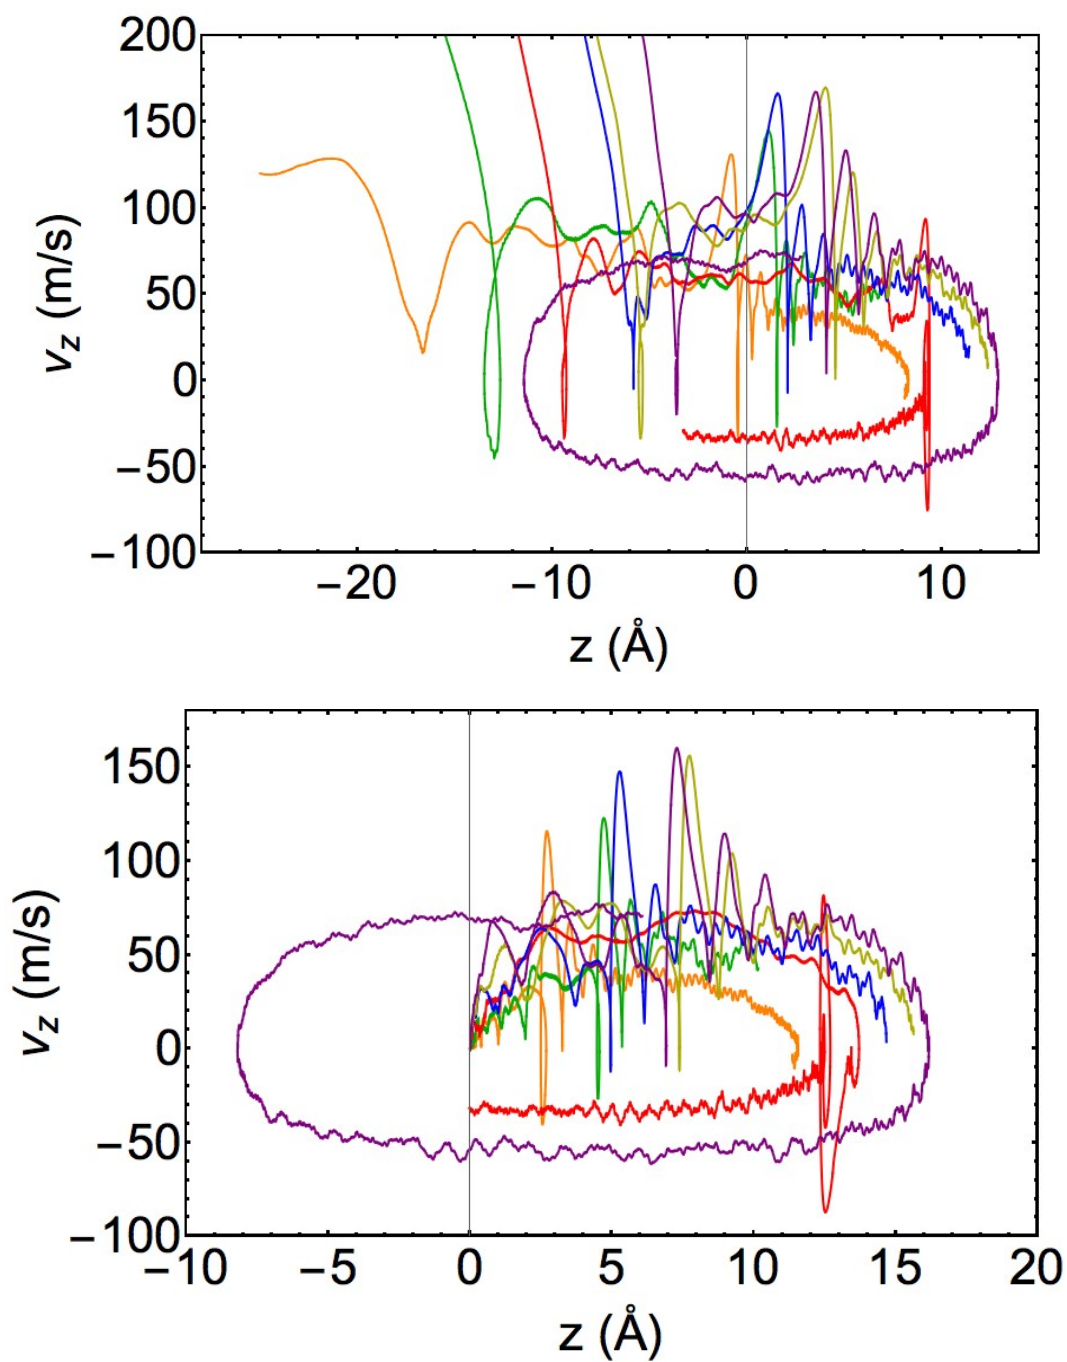

**Figure S2.** Trajectories of the mean values of the Ne atoms velocities and positions as a function of  $\langle v_0 \rangle$  (impinging Ne atom (up) and inner Ne atom (down)), for the nanodroplet with  $N=500$ : orange (120 m/s), green (300 m/s), red (500 m/s), blue (750 m/s), green olive (800 m/s) and violet (1000 m/s).

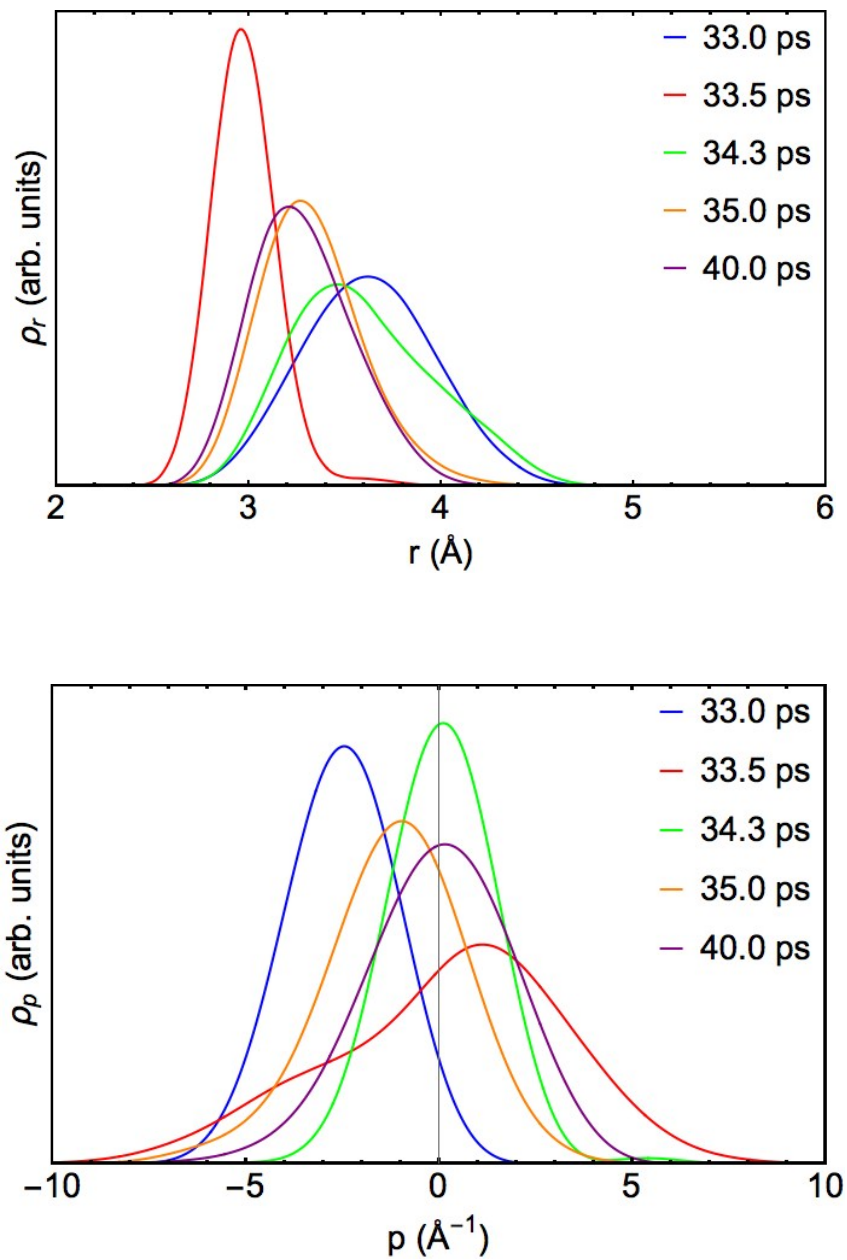

**Figure S3.** Snapshots showing the temporal evolution of the probability density of the relative coordinate wave packet in coordinate (up) and momentum (down) representations, for  $\langle v_0 \rangle = 120$  m/s and the nanodroplet with  $N=500$ .

**Movie 1.** Time evolution of the relative coordinate wave packet (squared modulus) in coordinate (in Å; up left) and momentum (in Å<sup>-1</sup>, up right) representations. The effective potential energy is also plotted (in K; up left). Time evolution of the helium density in the xz-plane as 2D (down left) and 3D (down right) plots. This is for  $N=500$ ,  $\langle v_0 \rangle = 120$  m/s and the simulated time is 71.0 ps. See the AVI video file “Movie 1\_N500\_v120.avi” (0.85 MB).

**Movie 2.** The same as Movie 1 but for  $N=500$ ,  $\langle v_0 \rangle = 500$  m/s and the simulated time is 88.7 ps. See the AVI video file “Movie 2\_N500\_v500.avi” (1.00 MB).

**Movie 3.** The same as Movie 1 but for  $N=500$ ,  $\langle v_0 \rangle = 800$  m/s and the simulated time is 31.7 ps. See the AVI video file “Movie 3\_N500\_v800.avi” (0.34 MB).

**Movie 4.** The same as Movie 1 but for  $N=200$ ,  $\langle v_0 \rangle = 120$  m/s and the simulated time is 98.6 ps. See the AVI video file “Movie 4\_N200\_v120.avi” (1.13 MB).

**Movie 5.** The same as Movie 1 but for  $N=200$ ,  $\langle v_0 \rangle = 800$  m/s and the simulated time is 48.9 ps. See the AVI video file “Movie 5\_N200\_v800.avi” (0.52 MB).

**Movie 6.** The same as Movie 1 but for  $N=1000$ ,  $\langle v_0 \rangle = 120$  m/s and the simulated time is 65.2 ps. See the AVI video file “Movie 6\_N1000\_v120.avi” (0.77 MB).

**Movie 7.** The same as Movie 1 but for  $N=1000$ ,  $\langle v_0 \rangle = 800$  m/s and the simulated time is 68.0 ps. See the AVI video file “Movie 7\_N1000\_v800.avi” (0.75 MB).
